1 TITLE

2 The use of germicidal ultraviolet light, vaporised hydrogen peroxide and dry heat to decontaminate  
3 face masks and filtering respirators contaminated with an infectious norovirus

4

5 RUNNING TITLE

6 Norovirus mask and FFR decontamination

7

8 AUTHORS

9 Constance Wielick<sup>1,\*</sup>, Louisa F. Ludwig-Begall<sup>1,\*</sup>, Lorène Dams<sup>1</sup>, Ravo M. Razafimahefa<sup>1</sup>, Pierre-  
10 Francois Demeuldre<sup>2</sup>, Aurore Napp<sup>2</sup>, Jan Laperre<sup>3</sup>, Olivier Jolois<sup>3</sup>, Frédéric Farnir<sup>5</sup>, Eric Haubruge<sup>4</sup>  
11 and Etienne Thiry<sup>1,#</sup>

12

13 AUTHOR AFFILIATIONS

14 <sup>1</sup> Veterinary Virology and Animal Viral Diseases, Department of Infectious and Parasitic Diseases,  
15 FARAH Research Centre, Faculty of Veterinary Medicine, University of Liège, Liège, Belgium

16 <sup>2</sup> Department of Hospital Pharmacy, The University Hospital Center, University of Liège, Liège,  
17 Belgium

18 <sup>3</sup> Centexbel Textile Research Centre, Grace-Hollogne, Belgium

19 <sup>4</sup> TERRA Research Centre, Gembloux Agro-Bio Tech, University of Liège, Gembloux, Belgium

20 <sup>5</sup> Biostatistics and Bioinformatics Applied to Veterinary Science, FARAH Research Centre, Faculty of  
21 Veterinary Medicine, University of Liège, Liège, Belgium

22

23 \*These authors contributed equally to this work.

24 #Corresponding author: [etienne.thiry@uliege.be](mailto:etienne.thiry@uliege.be)

25 Orcid ID: 0000-0002-9585-7933)

26

27 WORD COUNT:

28 1645 (Introduction, Materials and Methods, Results and Discussion)

Non-standard abbreviations:

FFR: filtering facepiece respirator

SM: surgical mask

MuNoV: murine norovirus

SARS-CoV-2: severe acute respiratory syndrome coronavirus 2

**NOTE: This preprint reports new research that has not been certified by peer review and should not be used to guide clinical practice.**

29 ABSTRACT

30

31 In the context of the SARS-CoV-2 pandemic, reuse of surgical masks and filtering facepiece  
32 respirators has been recommended. Their reuse necessitates procedures to inactivate contaminating  
33 human respiratory and oral pathogens. We previously demonstrated decontamination of masks and  
34 respirators contaminated with an infectious SARS-CoV-2 surrogate via ultraviolet germicidal  
35 irradiation, vaporised hydrogen peroxide, and use of dry heat. Here, we show that these same methods  
36 efficiently inactivate a more resistant, non-enveloped oral virus; decontamination of infectious murine  
37 norovirus-contaminated masks and respirators reduced viral titres by over four orders of magnitude on  
38 mask or respirator coupons.

39

40

41 KEYWORDS

42 Decontamination (UV; H<sub>2</sub>O<sub>2</sub>; dry heat); respirator; surgical mask; norovirus

43

44 INTRODUCTION

45

46 In the context of the ongoing severe acute respiratory syndrome coronavirus 2 (SARS-CoV-2)  
47 pandemic, the supply of personal protective equipment remains under strain and re-use of surgical face  
48 masks (masks) and filtering facepiece respirators (FFRs) has been recommended [1]. Prior  
49 decontamination is paramount to safe re-use of these items and must ideally inactivate both SARS-  
50 CoV-2 and other contaminating respiratory or oral human pathogens [2].

51

52 Human respiratory pathogens include other enveloped corona-, pneumo-, metapneumo-, paramyxo-,  
53 and orthomyxoviruses as well as non-enveloped coxsackie- and rhinoviruses; oral pathogens include  
54 astro-, picorna-, polio-, rota- and noroviruses (all non-enveloped) [3]. Enveloped viruses, surrounded  
55 by an outer lipid layer, are susceptible to harsh environmental conditions and inactivating treatments;  
56 non-enveloped viruses are known to be significantly more resistant. The small, non-enveloped human  
57 noroviruses (genus *Norovirus*, family *Caliciviridae*), recognised as the major global cause of viral  
58 gastroenteritis [4], are notorious for their tenacity in the face of decontamination [5]. The genetically  
59 and structurally similar murine norovirus (MuNoV), which replicates efficiently *in vitro*, has been  
60 identified as an appropriate surrogate virus for modelling human norovirus inactivation [6].

61

62 We previously demonstrated efficient decontamination of masks and FFRs contaminated with an  
63 infectious SARS-CoV-2 surrogate virus via ultraviolet germicidal irradiation, vaporised hydrogen  
64 peroxide, and use of dry heat [7]. In the present investigation into decontamination of MuNoV-

65 inoculated masks and FFRs, we show that these same methods efficiently inactivate a more resistant,  
66 non-enveloped oral virus. All three methods permit demonstration of a loss of viral infectivity by more  
67 than three orders of magnitude in line with the FDA policy regarding face masks and respirators [2].  
68 Inactivation of a norovirus, the most resistant of the respiratory and oral human viruses, can predict the  
69 inactivation of any less resistant viral mask or FFR contaminant.

70

## 71 METHODS

72 Efficacy of three different decontamination methods in inactivating an infectious norovirus was  
73 assessed using masks and FFRs experimentally inoculated with MuNoV. Per decontamination method  
74 and mask type, one negative control mask or FFR (uncontaminated but treated), three treated masks or  
75 FFRs (MuNoV-contaminated and treated), and three positive controls (MuNoV-contaminated but  
76 untreated) were utilised. The workflow followed previously described protocols for mask and FFR  
77 inoculation, decontamination and virus elution [7].

78

### 79 **Virus and cells**

80 The murine macrophage cell line RAW264.7 (ATCC TIB-71) was maintained in Dulbecco's modified  
81 Eagle's medium (Invitrogen) containing 10% heat inactivated foetal calf serum (FCS) (BioWhittaker),  
82 2% of an association of penicillin (5000 SI units/ml) and streptomycin (5 mg/ml) (PS, Invitrogen) and  
83 1% 1 M HEPES buffer (pH 7.6) (Invitrogen) at 37 °C with 5% CO<sub>2</sub>.

84

85 Stocks of MuNoV isolate MNV-1.CW1 were produced by infection of RAW264.7 cells at a  
86 multiplicity of infection of 0.05. Two days post-infection, cells and supernatant were harvested and  
87 clarified by centrifugation for 20 minutes at 1000 x g after three freeze/thaw cycles (- 80°C/37°C).

88

89 Titres were determined via the tissue culture infective dose (TCID<sub>50</sub>) method; RAW 264.7 cells were  
90 seeded in 96-well plates, infected with 10-fold serial dilutions of MuNoV, incubated for three days at  
91 37 °C with 5% CO<sub>2</sub>, and finally stained with 0.2% crystal violet for 30 minutes. Titres, expressed as  
92 TCID<sub>50</sub>/ml, were calculated according to the Reed and Muench transformation [8]. A virus stock with  
93 a titre of 10<sup>7.06</sup> TCID<sub>50</sub>/ml was used in subsequent steps.

94

### 95 **Surgical masks and filtering facepiece respirators**

96 All masks and FFRs, verified to be from the same respective manufacturing lot, were supplied by the  
97 Department of the Hospital Pharmacy, University Hospital Centre of Liege (Sart-Tilman).

98 Manufacturers (and models): KN95 FFR - Guangzhou Sunjoy Auto Supplies CO. LTD, Guangdong,  
99 China (2020 N°26202002240270); surgical mask (Type II) - Hangzhou Sunten Textile Co., LTD,  
100 Hangzhou, China (SuninCare™, Protect Plus).

101

102 **Murine norovirus inoculation of surgical masks and filtering facepiece respirators,**  
103 **decontamination, elution and quantification**

104 Per treated or control mask or FFR, 100 µl of undiluted viral suspension were injected under the first  
105 outer layer at the centre of each of three square coupons (34 mm x 34 mm). In addition to inoculation  
106 of the *de facto* masks or FFRs, 100 µl of viral suspension was pipetted onto one elastic strap per  
107 contaminated mask or FFR. Masks and FFRs were allowed to dry for 20 minutes at room temperature  
108 before decontamination via UV irradiation, vaporised H<sub>2</sub>O<sub>2</sub>, and dry heat.

109

110 Masks and FFRs were individually UV-irradiated for 2 minutes (2.6J/cm<sup>2</sup> fluence per mask), using a  
111 LS-AT-M1 (LASEA Company, Sart Tilman, Belgium). Vaporous hydrogen peroxide (VHP) treatment  
112 was performed with the V-PRO Max Sterilizer (Steris, Mentor, OH) which uses 59% liquid H<sub>2</sub>O<sub>2</sub> to  
113 generate hydrogen peroxide vapor. A 28-minute non lumen cycle was used, consisting of 2 min 40 sec  
114 conditioning (5 g/min), 19 min 47 sec decontamination (2.2 g/min) and 7 min 46 sec aeration (750  
115 ppm peak VHP concentration). Dry heat decontamination was performed at temperatures of 102°C (±  
116 4°C) for 60 min (± 15 min) in an electrically heated vessel (M-Steryl, AMB Ecosteryl Company,  
117 Mons, Belgium).

118

119 Upon completion of the decontamination protocols, MuNoV was eluted from three excised coupons  
120 and one severed elastic strap per mask or FFR into 4 mL elution medium (Eagle's DMEM (Sigma))  
121 supplemented with 2 % of an association of penicillin (5000 SI units/mL) and streptomycin (5 mg/mL)  
122 (PS, Sigma) and, for elution from VHP-treated materials, 20% FCS and 0.1% β-mercaptoethanol) via  
123 1 minute (coupons) or 20 minute vortex (straps) at maximum speed (2500 rounds per minute; VWR  
124 VX-2500 Multi-Tube Vortexer).

125

126 Titres of infectious MuNoV recovered from individual coupons and straps were determined via  
127 TCID<sub>50</sub> assay. Back titrations of inoculum stocks were performed in parallel to each series of  
128 decontamination experiments.

129

130 **Data analysis and statistics**

131 All statistical analyses were performed using SAS® software 9.3 (SAS/ETS 12.1 - SAS STAT 12.1).  
132 Linear mixed models were studied using the MIXED procedure; in addition, TOBIT models were  
133 implemented using the qualitative and limited dependent variable model (QLIM) procedure. All p-  
134 values reported using the QLIM procedure were obtained using Wald tests.

135

## 136 RESULTS

137 Back titrations of virus inoculums performed in parallel to each series of experiments confirmed  
138 MuNoV inoculum titres to be within a range of  $3.55 \times 10^7$  to  $6.31 \times 10^7$  TCID<sub>50</sub>/mL for all experiments.

139

140 The cell culture limit of detection (LOD) was 0.8 log<sub>10</sub> TCID<sub>50</sub>/ml for all analyses except those  
141 concerning H<sub>2</sub>O<sub>2</sub>-treated mask- or FFR straps (2.8 log<sub>10</sub> TCID<sub>50</sub>/ml) and UV-treated FFR straps (1.8  
142 log<sub>10</sub> TCID<sub>50</sub>/ml).

143

144 High levels of infectious virus were recovered from MuNoV-inoculated, untreated coupons of all  
145 masks and FFRs, with mean overall recovery values of 4.94 (±0.55 standard deviation (SD)) log<sub>10</sub>  
146 TCID<sub>50</sub>/mL. Mean strap recovery values were similar between experiments, however they were lower  
147 than coupon recovery values (notable exception: elution from untreated masks), with mean values of  
148 4.11 (±0.77 SD) log<sub>10</sub> TCID<sub>50</sub>/mL (Figure 1).

149

150 Following mask UV irradiation and dry heat treatment, titres for virus recovered from coupons  
151 remained below the assay LOD, showing total loss of infectivity of around four orders of magnitude  
152 ( $3.64 (\pm 0.28 \text{ SD})$  log<sub>10</sub> TCID<sub>50</sub>/mL and  $4.06 (\pm 0.30 \text{ SD})$  log<sub>10</sub> TCID<sub>50</sub>/mL, respectively), while titres  
153 of virus recovered from H<sub>2</sub>O<sub>2</sub>- vaporised coupons indicated a loss of infectivity of four orders of  
154 magnitude ( $4.06 (\pm 0.30 \text{ SD})$  log<sub>10</sub> TCID<sub>50</sub>/mL). Titres of virus recovered from treated mask straps  
155 were reduced by two orders of magnitude post UV irradiation and H<sub>2</sub>O<sub>2</sub>-treatment ( $2.06 (\pm 0.29 \text{ SD})$   
156 log<sub>10</sub> TCID<sub>50</sub>/mL, and  $2.08 (\pm 0.38 \text{ SD})$  log<sub>10</sub> TCID<sub>50</sub>/mL, respectively) and by four orders of  
157 magnitude post heat-treatment ( $4.25 (\pm 0.25 \text{ SD})$  log<sub>10</sub> TCID<sub>50</sub>/mL (below LOD)).

158

159 Decontamination followed a similar pattern of viral inactivation for UV-treated FFR coupons,  
160 reducing viral titres by around four orders of magnitude ( $3.97 (\pm 0.40 \text{ SD})$  log<sub>10</sub> TCID<sub>50</sub>/mL).  
161 Following vaporised H<sub>2</sub>O<sub>2</sub>- and dry heat-treatment, titres for virus recovered from coupons showed a  
162 loss of infectivity of three orders of magnitude ( $3.72 (\pm 0.29 \text{ SD})$  log<sub>10</sub> TCID<sub>50</sub>/mL and  $3.64 (\pm 0.66$   
163  $\text{SD})$  log<sub>10</sub> TCID<sub>50</sub>/mL, respectively). UV-, H<sub>2</sub>O<sub>2</sub>- and heat-treatment of FFR straps reduced infectivity  
164 by to a lesser degree ( $1.58 (\pm 0.14 \text{ SD})$  log<sub>10</sub> TCID<sub>50</sub>/mL, from  $3.38 (\pm 0.14 \text{ SD})$  log<sub>10</sub> TCID<sub>50</sub>/mL to  
165 below the LOD,  $0.75 (\pm 0.90 \text{ SD})$  log<sub>10</sub> TCID<sub>50</sub>/mL and  $2.75 (\pm 0.50 \text{ SD})$  TCID<sub>50</sub>/mL, respectively).

166

167 CONCLUSIONS

168 This is, to our knowledge, the first description of stable disinfection of surgical masks and FFRs  
169 contaminated with an infectious norovirus using UV irradiation, vaporised H<sub>2</sub>O<sub>2</sub>, and dry heat  
170 treatment.

171

172 Here we demonstrate successful recovery of high quantities of infectious MuNoV from inoculated,  
173 otherwise untreated masks and FFR coupons. Three decontamination methods, chemical vaporised  
174 H<sub>2</sub>O<sub>2</sub> and physical inactivation via UV irradiation and dry heat treatment, successfully reduced  
175 infectious loads of MuNoV inoculated under the outer surface layer of mask and FFR coupons by  
176 more than three orders of magnitude. Since carrier surfaces likely influence decontamination efficacy,  
177 we examined viral inactivation not only on the *de facto* FFRs or masks, but also on their elastic straps  
178 that may become equally contaminated. We compared titres of infectious virus recovered from  
179 inoculated, untreated mask or FFR straps and those inoculated and subsequently decontaminated.  
180 While all three decontamination methods were successfully validated as they reduced viral loads by at  
181 least more than three orders of magnitude, the elevated LOD of UV-treated FFR straps and H<sub>2</sub>O<sub>2</sub>-  
182 vaporised mask- and FFR straps prevented detection of higher infectivity losses. Further studies are  
183 planned to elucidate these effects, which may potentially be associated either to inherent virucidal  
184 properties of or poor elution from the elastic materials.

185

186 In conclusion, we describe successful validation of three decontamination methods, UV irradiation,  
187 vaporised H<sub>2</sub>O<sub>2</sub>, and dry heat treatment, in inactivating an infectious non-enveloped virus in line with  
188 the FDA policy regarding face masks and FFRs. The MuNoV surrogate supplements existing data  
189 regarding decontamination of surgical masks and FFRs, and both it and the different decontamination  
190 methods tested, are easily adaptable to other FFR and mask types, presenting a useful conservative  
191 model for stable validation of non-enveloped virus decontamination.

192

193 ACKNOWLEDGEMENTS

194 The authors express their sincere gratitude to Amélie Matton and Frédéric de Meulemeester (AMB  
195 Ecosteryl, Mons, Belgium), Axel Kupisiewicz (LASEA, Sart-Tilman, Belgium), Pierre Leonard  
196 (Solwalfin, Belgium) for suggestions and technical and administrative support.

197

198 CONFLICTS OF INTEREST STATEMENT

199 The authors have no conflicts of interest to disclose.

200

201 FUNDING SOURCE

202 This work was supported by grants from the Walloon Region, Belgium (Project 2010053 -2020-  
203 “MASK - Decontamination and reuse of surgical masks and filtering facepiece respirators”) and the  
204 ULiège Fonds Spéciaux pour la Recherche 2020.

205 REFERENCES

206

- 207 [1] World Health Organization (WHO). Rational use of personal protective equipment for  
208 coronavirus disease 2019 ( COVID-19 ). *Who* 2020;2019:1–7.
- 209 [2] Center for Devices and Radiological Health. Enforcement Policy for Face Masks and  
210 Respirators During the Coronavirus Disease (COVID-19) Public Health Emergency (Revised)  
211 Guidance for Industry and Food and Drug Administration Staff 2020.
- 212 [3] Kramer A, Schwebke I, Kampf G. How long do nosocomial pathogens persist on inanimate  
213 surfaces? A systematic review. *BMC Infect Dis* 2006;6:1–8. [https://doi.org/10.1186/1471-](https://doi.org/10.1186/1471-2334-6-130)  
214 [2334-6-130](https://doi.org/10.1186/1471-2334-6-130).
- 215 [4] Robilotti E, Deresinski S, Pinsky BA. Norovirus. *Clin Microbiol Rev* 2015;28:134–64.  
216 <https://doi.org/10.1128/CMR.00075-14>.
- 217 [5] Zonta W, Mauroy A, Farnir F, Thiry E. Comparative Virucidal Efficacy of Seven Disinfectants  
218 Against Murine Norovirus and Feline Calicivirus, Surrogates of Human Norovirus. *Food*  
219 *Environ Virol* 2015. <https://doi.org/10.1007/s12560-015-9216-2>.
- 220 [6] Nims RW, Zhou SS. Intra-family differences in efficacy of inactivation of small, non-  
221 enveloped viruses. *Biologicals* 2016;44:456–62.  
222 <https://doi.org/10.1016/j.biologicals.2016.05.005>.
- 223 [7] Ludwig-Begall LF, Wielick C, Dams L, Nauwynck H, Demeuldre P-F, Napp A, et al. The use  
224 of germicidal ultraviolet light, vaporised hydrogen peroxide and dry heat to decontaminate face  
225 masks and filtering respirators contaminated with a SARS-CoV-2 surrogate virus. *J Hosp*  
226 *Infect* 2020. <https://doi.org/10.1016/j.jhin.2020.08.025>.
- 227 [8] Reed, L.J.; Muench H. A simple method of estimating fifty percent endpoints. *Am J Hyg*  
228 1938;27.



FIGURES

Figure 1

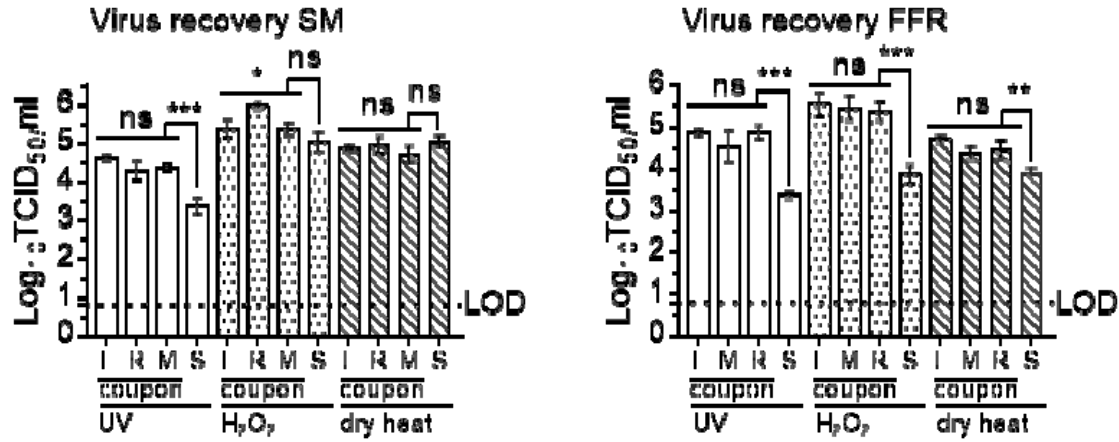

Figure 2

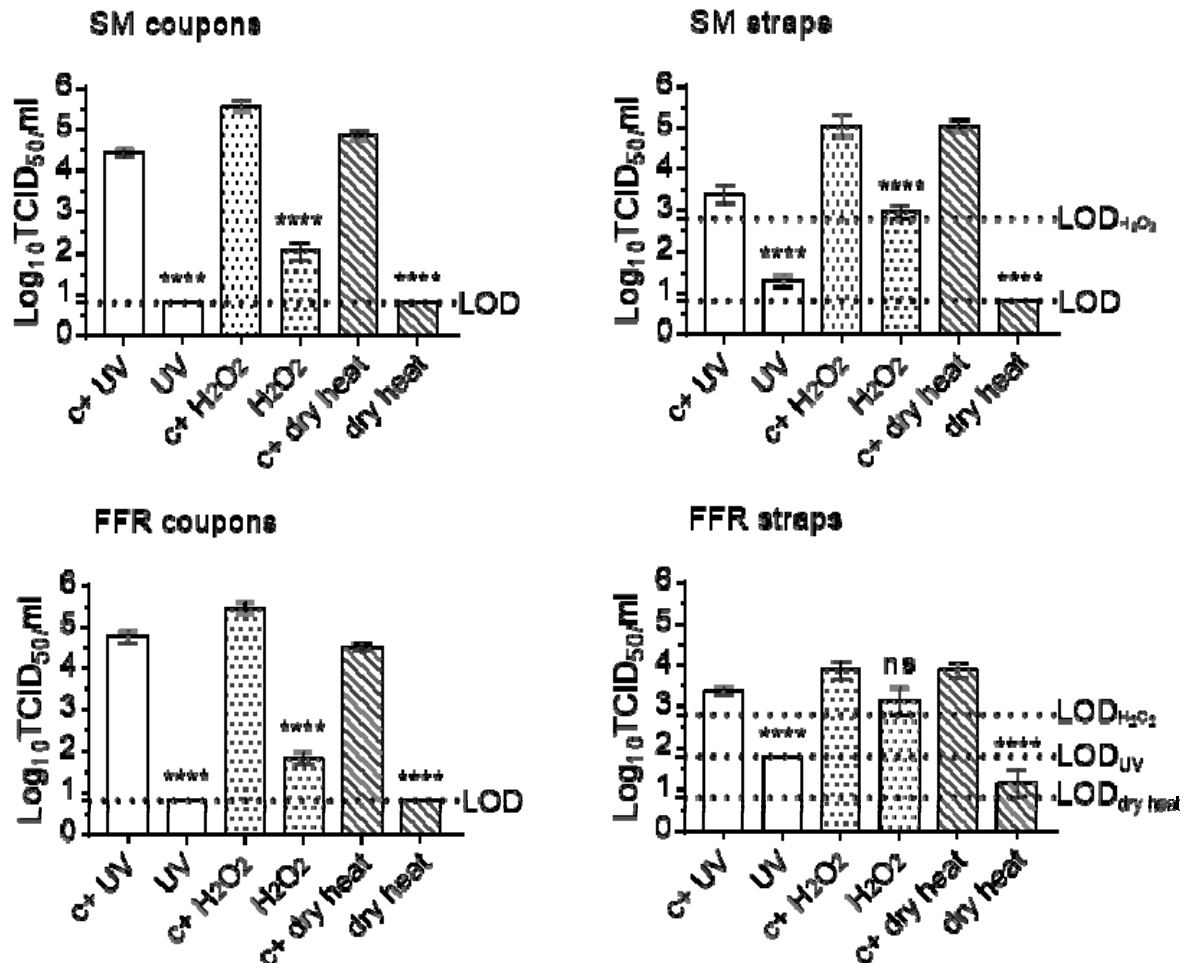



229 LEGENDS

230

231 Figure 1. Recovery of MuNoV after elution from inoculated, untreated surgical masks and filtering  
232 facepiece respirators. Recovery of infectious murine norovirus (MuNoV) from inoculated untreated  
233 surgical masks (SM) and filtering facepiece respirators (FFR) was analysed in RAW 264.7 cells. The  
234 cell culture limit of detection (LOD) was  $0.8 \log_{10}$  TCID<sub>50</sub>/mL. Similar levels of virus recovery were  
235 detected for left, right and middle (L, R, M) coupons of masks and respirators; recovery efficacy of  
236 infectious virus from straps (S) deviated significantly in all analyses from the mean of all coupons  
237 (with the exception of extraction from SM straps in the H<sub>2</sub>O<sub>2</sub> assay). Statistical analyses were  
238 performed using SAS® software 9.3 (SAS/ETS 12.1 - SAS STAT 12.1). Linear mixed models were  
239 studied using the MIXED procedure; in addition, TOBIT models were implemented using the  
240 qualitative and limited dependent variable model (QLIM) procedure. All p-values reported using the  
241 QLIM procedure were obtained using Wald tests. P-values were computed to calculate differences  
242 between individual coupon values and differences between mean values of all coupons and straps:  
243 \*\*\*P<0.001, \*\*P<0.01, \*P<0.05, and ns is P≥0.05.

244

245

246 Figure 2. Effect of three decontaminating treatments on MuNoV-inoculated surgical mask- and  
247 filtering facepiece respirator coupons and straps. The infectivity of murine norovirus (MuNoV)  
248 recovered from surgical masks (SM) and filtering facepiece respirators (FFR) decontaminated via  
249 exposure to ultraviolet light (UV), vaporised hydrogen peroxide (H<sub>2</sub>O<sub>2</sub>), or dry heat treatment was  
250 analysed in RAW 264.7 cells. The cell culture limit of detection (LOD) was  $0.8 \log_{10}$  TCID<sub>50</sub>/ml for  
251 all analyses except those concerning H<sub>2</sub>O<sub>2</sub>-treated SM or FFR straps ( $1.8$  and  $2.8 \log_{10}$  TCID<sub>50</sub>/ml,  
252 respectively) and UV-treated FFR straps ( $1.8 \log_{10}$  TCID<sub>50</sub>/ml). Per decontamination method, nine  
253 MuNoV-inoculated, decontaminated coupons (n=9) and three inoculated, decontaminated straps (n=3)  
254 were analysed in parallel to inoculated, untreated, positive control coupons (n=9) and straps (n=3).  
255 Statistical analyses were performed using SAS® software 9.3 (SAS/ETS 12.1 - SAS STAT 12.1). Linear  
256 mixed models were studied using the MIXED procedure; in addition, TOBIT models were  
257 implemented using the qualitative and limited dependent variable model (QLIM) procedure. All p-  
258 values reported using the QLIM procedure were obtained using Wald tests; \*\*\*\*P<0.0001;  
259 \*\*\*P<0.001, \*\*P<0.01, \*P<0.05, and ns is P≥0.05.

260
